# Supplementary material for: Subclinical Atherosclerosis Measure by Carotid Ultrasound and Inflammatory Activity in Patients with Rheumatoid Arthritis and Spondylarthritis
Source: MDPI journal article supplement (doi:10.3390/jcm11030662), 2022-01-27
Supplement: s1 [file s1]

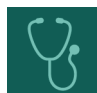

**Table S1.** Logistic regression models (DV: atheromatous plaque) according to inflammatory activity.

|                       | Atheromatous plaque               |                  |                         |                  |                                   |                  |                         |                  |
|-----------------------|-----------------------------------|------------------|-------------------------|------------------|-----------------------------------|------------------|-------------------------|------------------|
|                       | Remission-low activity<br>(n=153) |                  |                         |                  | Moderate-high activity<br>(n=148) |                  |                         |                  |
|                       | Crude OR (95%<br>CI)              | <i>p-value</i>   | Adjusted OR<br>(95% CI) | <i>p-value</i>   | Crude OR (95%<br>CI)              | <i>p-value</i>   | Adjusted OR<br>(95% CI) | <i>p-value</i>   |
| Diagnosis (RA)        | 2.57 (1.18-5.98)                  | <b>0.021</b>     | 2.24 (0.36-14.07)       | 0.381            | 1.77 (0.82-3.78)                  | 0.141            | 1.69 (0.21-14.01)       | 0.619            |
| Male sex              | 1.14 (1.09-1.19)                  | <b>&lt;0.001</b> | 1.15 (1.07-1.25)        | <b>&lt;0.001</b> | 1.16 (1.1-1.24)                   | <b>&lt;0.001</b> | 1.19 (1.09-1.33)        | <b>&lt;0.001</b> |
| Age (years)           | 2.20 (1.07-4.61)                  | <b>0.034</b>     | 12.4 (3.37-57.6)        | <b>&lt;0.001</b> | 1.09 (0.52-2.31)                  | 0.808            | 0.75 (0.22-2.45)        | 0.643            |
| Disease course        | 1 (0.97-1.04)                     | 0.651            | 1.02 (0.95-1.09)        | 0.495            | 1.06 (1.03-1.09)                  | <b>&lt;0.001</b> | 1.05 (0.99-1.11)        | 0.064            |
| Statins               | 3.07 (1.29-7.3)                   | <b>0.010</b>     | 1.48 (0.42-5.17)        | 0.529            | 3.38 (1.29-8.95)                  | <b>0.012</b>     | 3.58 (0.77-19.5)        | 0.116            |
| Corticosteroids       | 2.29 (1.07-4.87)                  | <b>0.030</b>     | 1.78 (0.40-8.25)        | 0.443            | 0.83 (0.35-1.9)                   | 0.679            | 0.20 (0.03-1.14)        | 0.076            |
| Smoking               | 4.49 (2.09-9.85)                  | <b>&lt;0.001</b> | 6.49 (2.04-23.3)        | <b>0.002</b>     | 1.16 (0.54-2.51)                  | 0.689            | 6.63 (1.87-28.5)        | <b>0.006</b>     |
| Arterial hypertension | 4.10 (1.85-9.24)                  | <b>&lt;0.001</b> | 1.22 (0.32-4.72)        | 0.766            | 4.81 (2.12-11.16)                 | <b>&lt;0.001</b> | 0.97 (0.25-3.66)        | 0.970            |

Abbreviations: RA, rheumatoid arthritis; OR, odds ratio.
